# Supplementary material for: Fluorescence signaling of transition metal ions: a new approach
Source: Royal Society of Chemistry journal article supplement (doi:10.1039/b206364f), 2002-01-01
Supplement: b206364f.doc [file b206364f.doc]

**Supplementary materials:**

**Fluorescence Signalling of the Transition Metal Ions: A New Approach**

*N.B. Sankaran, S. Banthia, A. Das* *and A. Samanta**

**Table. S1.** Fluorescence outputa of **I** and **II** in the presence of the transition metal ions in tetrahydrofuran.

| Metal ion | I | | **II** | |
| --- | --- | --- | --- | --- |
| at 400 nmb | at 500 nmb | at 450 nmc | at 585 nmd |
| None | 1 | 1 | 1 | 1 |
| Cd2+ | 0.03 | 7.3 | 0.03 | 19.9 |
| Cr3+ | 0.01 | 6.9 | 0.01 | 22.6 |
| Zn2+ | 0.17 | 1.8 | 0.05 | 15.7 |
| Mn2+ | 0.03 | 1.2 | 0.14 | 14.9 |
| Cu2+ | 0.02 | 2.6 | 0.03 | 11.9 |
| Fe3+ | 0.02 | 4.9 | 0.01 | 19.5 |
| H+ | 0.08 | 2.4 | 0.28 | 7.4 |

afluorescence intensity relative to that in the absence of the metal ion, 10%; bex = 360 nm, cex = 375 nm; dex = 435 nm.

**Fig. S1.** Influence of the addition of NaClO4.H2O in ACN on the fluorescence of **I**. Concentrations of Na+ are i) 0 ii) 3 x10-4 iii) 5 x10-4 iv) 7.5 x10-4 v) 1.25 x10-3 and vi) 1.56 x10-2 M respectively.

**Fig. S2.** Effect of the polarity of the media and the metal ion (Cr3+) on the fluorescence spectra of **I**.The spectra shown in **a** and **b** are obtained in tetrahydrofuran and acetonitrile respectively. The concentration range of Cr3+ in **a** is 0 – 1.1 x 10-4 M and in **b** is 0 – 6.5 x 10-5 M. The arrows represent the direction of increase of Cr3+ concentration. The excitation wavelength was 360 nm. In acetonitrile, the new fluorescence band is clearly more intense and the fluorescence peak appears at a longer wavelength.

**Fig. S3.** Fluorescence excitation spectra of **I** in ACN in the absence (a) and in the presence (b) of Cr3+ (8.72 x 10-5 M). The spectra labeled a and b were obtained by monitoring the fluorescence at 400 and 510 nm, respectively.
